# Supplementary material for: The Association of Resilience with Mental Health in a Large Population-Based Sample (LIFE-Adult-Study)
Source: Int J Environ Res Public Health. 2022 Nov 29;19(23):15944. doi: 10.3390/ijerph192315944 (PMC9740913; doi:10.3390/ijerph192315944)
Supplement: Supplementary file 1 [file ijerph-19-15944-s001.zip › ijerph-2021236-supplementary.pdf]

**Table S1.** Descriptives and correlations of resilience and mental health symptoms in the study sample.

|                     | <i>M</i> | <i>SD</i> | <b>Resilience</b><br><i>r</i> | <b>Depressive<br/>Symptoms</b><br><i>r</i> | <b>Anxiety<br/>Symptoms</b><br><i>r</i> |
|---------------------|----------|-----------|-------------------------------|--------------------------------------------|-----------------------------------------|
| Resilience          | 60.50    | 10.43     | 1                             |                                            |                                         |
| Depressive symptoms | 13.25    | 4.77      | -0.227**                      | 1                                          |                                         |
| Anxiety symptoms    | 3.59     | 3.36      | -0.393**                      | 0.551**                                    | 1                                       |
| Perceived stress    | 0.26     | 0.15      | -0.451**                      | 0.448**                                    | 0.734**                                 |

Notes. *M*, *SD* and *r* are weighted by age and gender according to census data. Resilience, depressive symptoms, anxiety symptoms, and perceived stress were assessed with the 11-item Resilience Scale RS-11, the Center for Epidemiologic Studies Depression Scale (CES-D, cut-off: CES-D > 22), the General Anxiety Disorder Scale-7 (GAD-7, cut-off: GAD-7 > 9), and the Perceived Stress Questionnaire (PSQ, cut-off: PSQ > M + 2SD = 0.56).

\*\*  $p < 0.001$ .
